# Supplementary material for: Understanding the degradation mechanism of TTA-based blue fluorescent OLEDs by exciton dynamics and transient electroluminescence measurements
Source: Royal Society of Chemistry journal article supplement (doi:10.1039/d3cp03437b), 2023-01-01
Supplement: d3cp03437b1.pdf [file d3cp03437b1.pdf]

## Supporting Information

### **Understanding the Degradation Mechanism of TTA-based Blue Fluorescent OLEDs by Exciton Dynamics and Transient Electroluminescence Measurements**

*Yibing Wu, Shu Xiao, Kaiwen Guo, Xianfeng Qiao, Dezhi Yang, Yanfeng Dai, Qian Sun, Jiangshan Chen, and Dongge Ma\**

Institute of Polymer Optoelectronic Materials and Devices, Guangdong Provincial Key Laboratory of Luminescence from Molecular Aggregates, Guangdong-Hong Kong-Macao Joint Laboratory of Optoelectronic and Magnetic Functional Materials, State Key Laboratory of Luminescent Materials and Devices, South China University of Technology, Guangzhou 510640, China

E-mail: [msdgm@scut.edu.cn](mailto:msdgm@scut.edu.cn)

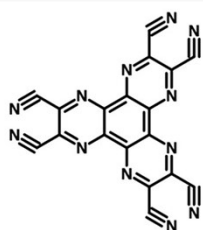

HAT-CN

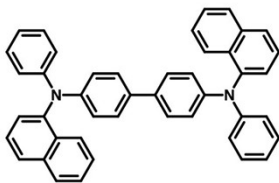

NPB

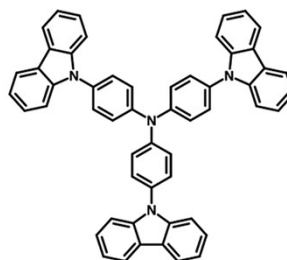

TCTA

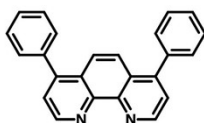

Bphen

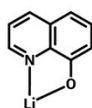

Liq

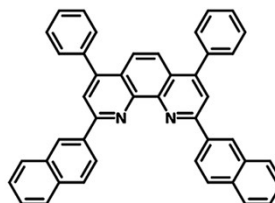

NBphen

**Fig. S1:** Molecular structures of the organic materials used in this work.

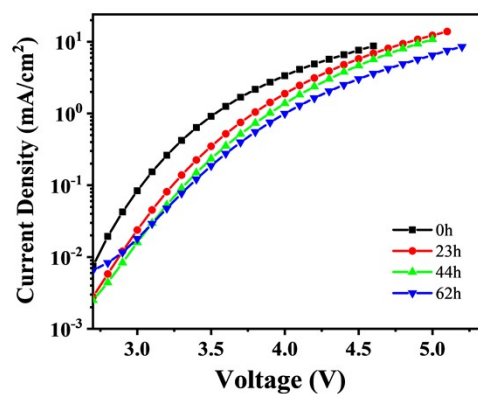

**Fig. S2:** Current density-voltage (J-V) characteristics of the resulting CzPA:BD doped blue fluorescent OLEDs aged for 0 hr (pristine), 23 hrs, 44 hrs and 62 hrs, respectively. As aging time increases, operating voltages at the same current densities increase, indicating that the charge transportation of the devices deteriorates during aging.

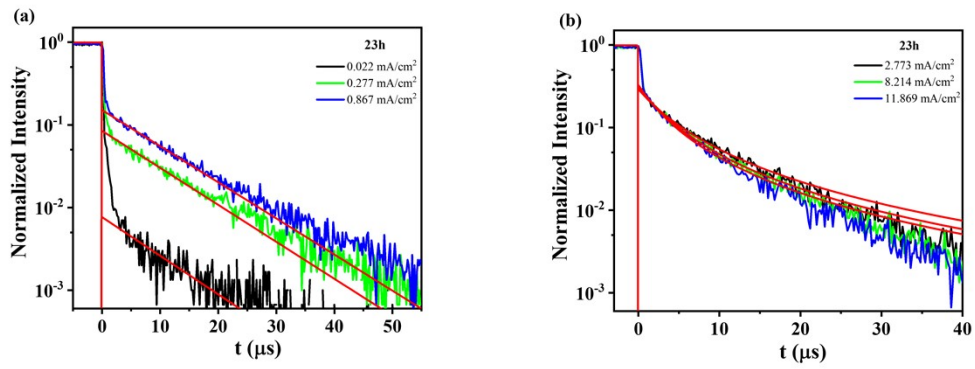

**Fig. S3:** Transient EL characteristics of the resulting CzPA:BD doped blue fluorescent OLEDs tested at aging time of 23 hrs (a) at low current density, and (b) at high current density.

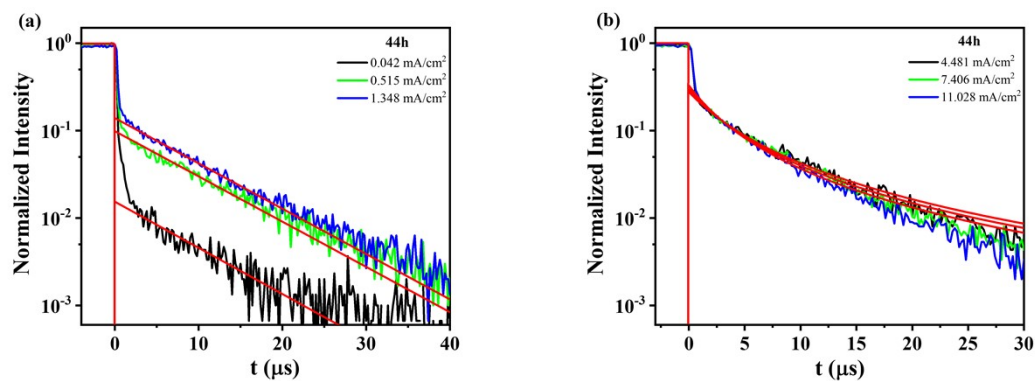

**Fig. S4:** Transient EL characteristics of the resulting CzPA:BD doped blue fluorescent OLEDs tested at aging time of 44 hrs (a) at low current density, and (b) at high current density.

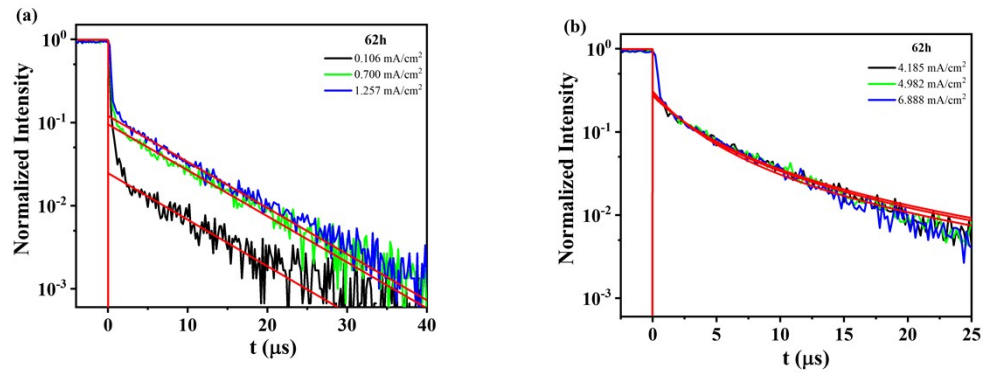

**Fig. S5:** Transient EL characteristics of the resulting CzPA:BD doped blue fluorescent OLEDs tested at aging time of 62 hrs (a) at low current density, and (b) at high current density.

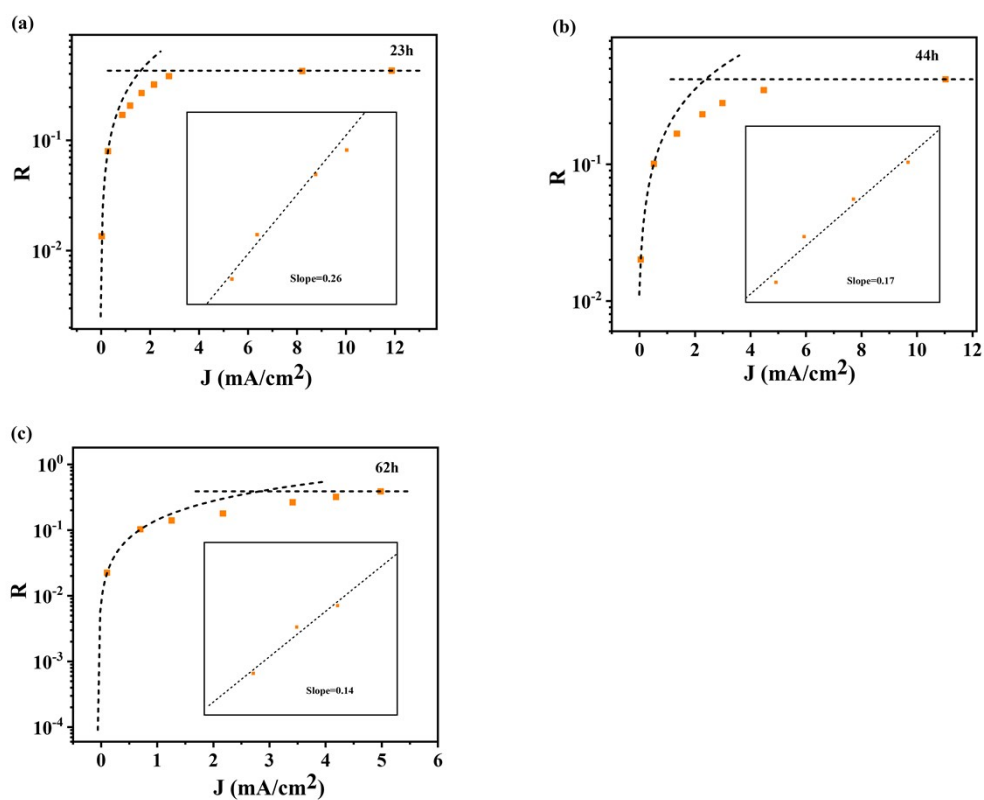

**Fig. S6:** R-J characteristics of the resulting CzPA:BD doped blue fluorescent OLEDs at aging times of (a) 23 hrs, (b) 44 hrs and (c) 62 hrs, respectively. The inserted graphs show the slopes of R-J curves at low current density.

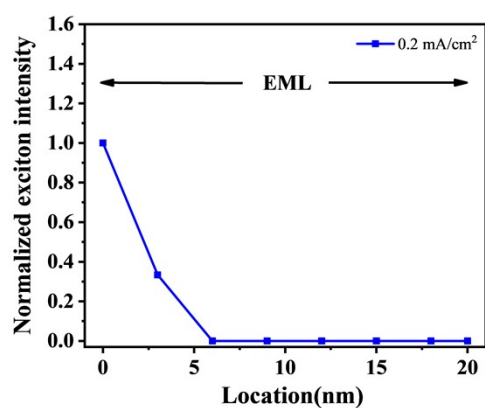

**Fig. S7:** Relative exciton distribution in the EML of the resulting CzPA:BD doped blue fluorescent OLEDs at the current density of 0.2 mA/cm<sup>2</sup>, respectively.  $x=0$  represents the interface between the EBL and the EML, and  $x=20$  nm represents the interface between the EML and the ETL.



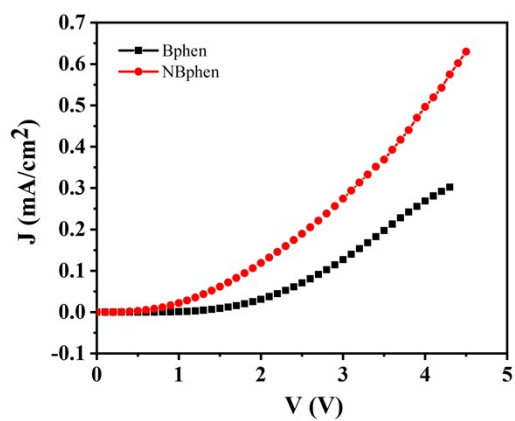

**Fig. S8:** J-V characteristics of the electron-only devices with Bphen and NBphen, respectively. The structure of the devices is ITO/ Al (5 nm)/ Liq (10 nm)/ Bphen or NBphen (40 nm)/ Liq (1.5 nm)/ Al. The 5-nm Al layer besides ITO is used to prevent holes from being injected from cathode into organic layers.
